# Supplementary material for: Injectable hydrogel platform with biodegradable Dawson-type polyoxometalate and R848 for combinational photothermal-immunotherapy of cancer
Source: Royal Society of Chemistry journal article supplement (doi:10.1039/d1bm01835c), 2022-01-01
Supplement: d1bm01835c1.pdf [file d1bm01835c1.pdf]

Electronic Supplementary Information (ESI)

**Injectable hydrogel platform with biodegradable molybdenum polyoxometalate and R848 for combinational photothermal-immunotherapy of cancer**

*Yandi Liu, Yu-Yang Han, Sha Lu, Yingjiao Wu, Juan Li\*, Xiaoyi Sun, Jun Yan\**

Hunan Provincial Key Laboratory of Micro & Nano Materials Interface Science, College of Chemistry and Chemical Engineering, Central South University, Changsha 410083, China

E-mail: [juanli@csu.edu.cn](mailto:juanli@csu.edu.cn) (J. Li); [yanjun@csu.edu.cn](mailto:yanjun@csu.edu.cn) (J. Yan)

## 1. Calculation of photothermal conversion efficiency

The photothermal conversion efficiency of three samples was calculated by using the following formula according to the methods of these articles<sup>1,2</sup>.

$$\eta = \frac{hS(T_{max} - T_{max, water})}{I(1 - 10^{-A_{808}})}$$

$$hS = \sum mC_p / \tau_s$$

$$\tau_s = (-t) / \ln \theta$$

$$\theta = (T_{amb} - T) / (T_{amb} - T_{max})$$

$h$  is the heat transfer coefficient;

$S$  is the surface area of the photothermal test vessel;

$\tau_s$  is the time constant of samples;

$m$  is the mass of samples (1.0 g);

$C_p$  is the specific heat capacity of water ( $C_p = 4.2 \text{ J} \cdot \text{mol}^{-1}$ );

$A_{808}$  is the absorbance at 808 nm of different samples.

According to the first heating-cooling process in the photothermal cycle,  $\tau_s$  is obtained by the linear relationship between the cooling period and natural logarithm of driving force temperature ( $T_{max, water} = 22.8 \text{ }^\circ\text{C}$ ).

For POM@GG hydrogel,  $T_{amb}$  is the temperature of the surroundings (21.0 °C),  $T_{max}$  is the equilibrium temperature of POM@GG hydrogel (42.6 °C), and the value of  $\tau_s$  is 281.69 (Figure S5),  $hS$  is calculated from the above equation ( $hS = 0.01491$ ). The deviation of  $T_{max}$  and  $T_{max, water}$  is 21.6 °C.  $I$  is 0.45 W where the area of light spot was 1.5 cm<sup>2</sup>, and  $A$  is the absorbance of POM@GG hydrogel at 808 nm ( $A_{808} = 1.41$ ). The photothermal conversion efficiency  $\eta$  is obtained from the first formula ( $\eta = 63.1\%$ ).

## 2. Supplementary Figures

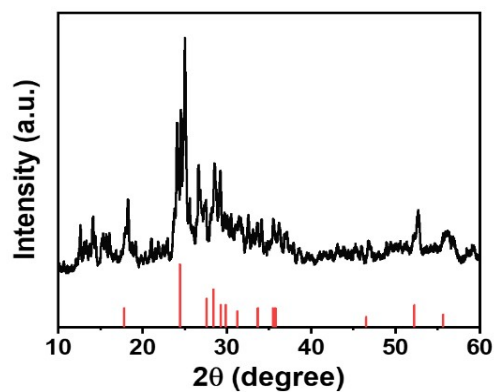

**Figure S1.** Powder X-ray diffraction (PXRD) analysis of ox-POM using Cu K $\alpha$  in the range of 10–60° with a scanning rate of 10°/min.

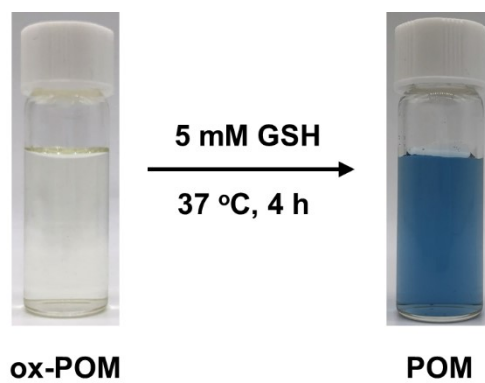

**Figure S2.** Color change of POM before and after reduction.

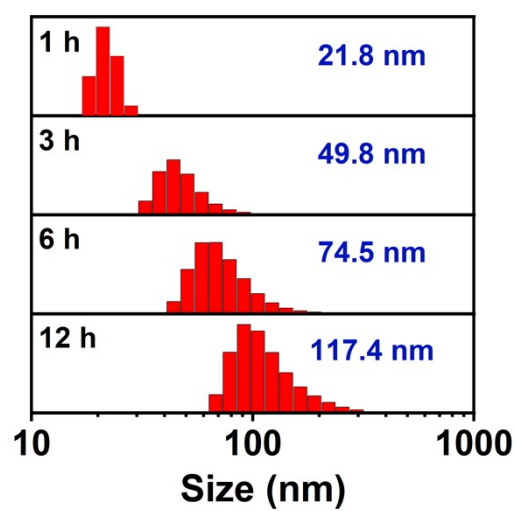

**Figure S3.** Size distribution of POM clusters as a function of time in the reduction process measured by the dynamic light scattering (DLS).

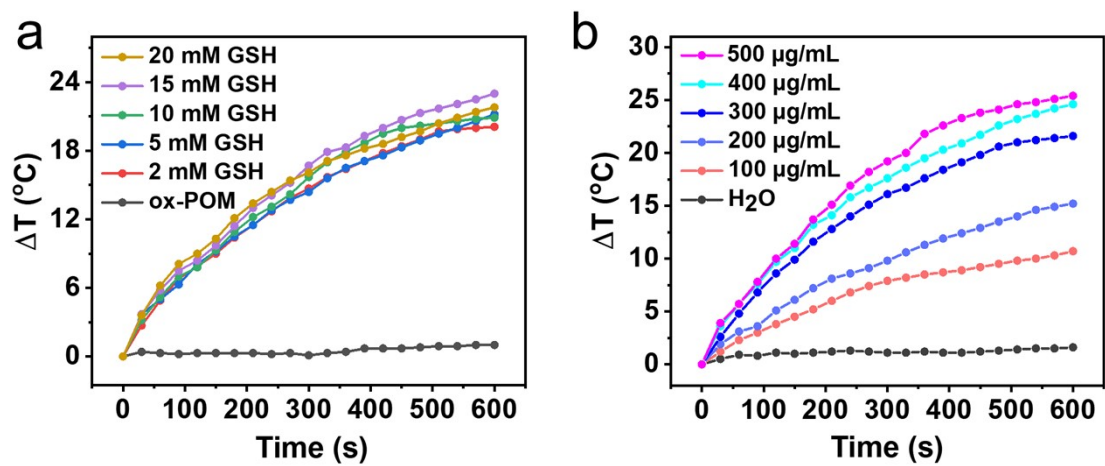

**Figure S4.** (a) Temperature rises of 300  $\mu\text{g/mL}$  POM solution under different GSH concentrations and (b) the temperature rises in different concentration POM solutions.

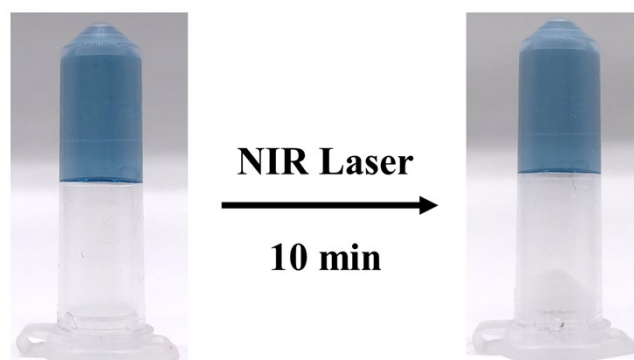

**Figure S5.** The image of POM@GG hydrogel before and after the NIR laser irradiation (808 nm, 0.3 W/cm<sup>2</sup>, 10 min).

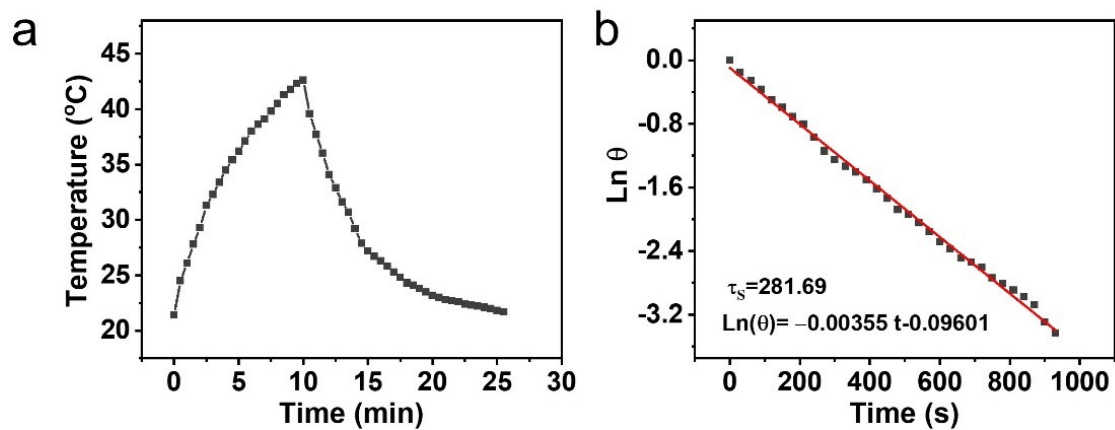

**Figure S6.** Calculation of photothermal conversion efficiency using the first photothermal cycle of POM@GG.



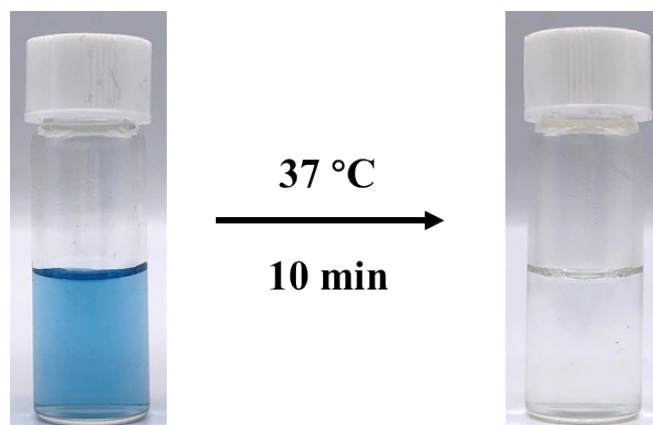

**Figure S7.** The color change of POM (300  $\mu\text{g}/\text{mL}$ , 1 mL) after being dispersed in the  $\text{H}_2\text{O}_2$  solution (10 mM, 1 mL).

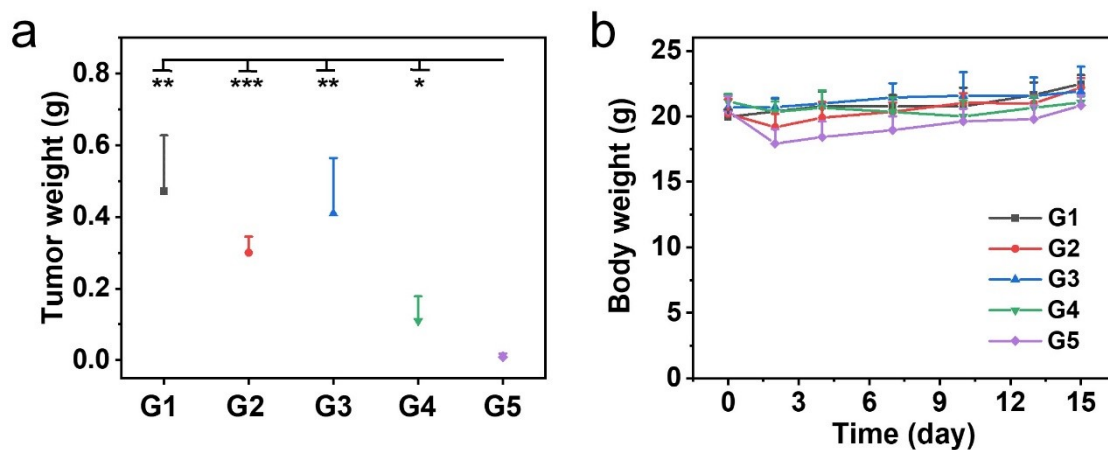

**Figure S8.** (a) The residual tumor weights after the treatment and (b) body weights of mice during the treatment. G1: untreated; G2: R848@GG; G3: POM@GG; G4: POM@GG with NIR; G5: R848/POM@GG with NIR.

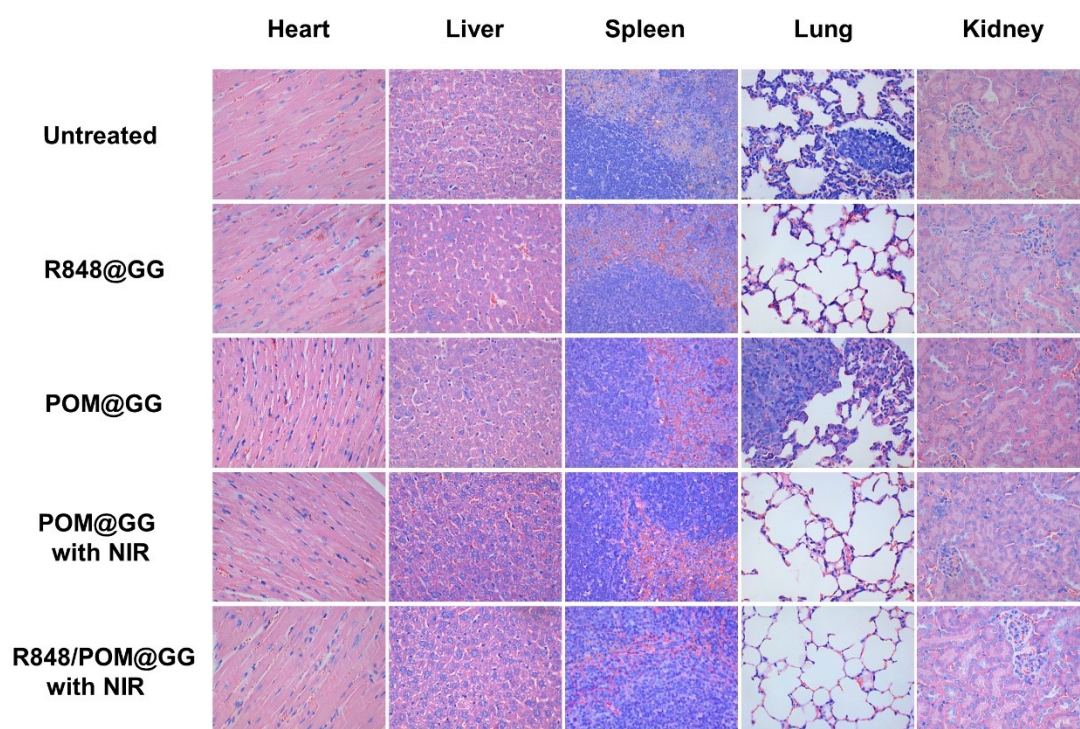

**Figure S9.** H&E staining images of major organs (heart, liver, spleen, lung, and kidney) in different groups after the treatment.

## References

1. C. Sun, L. Wen, J. Zeng, Y. Wang, Q. Sun, L. Deng, C. Zhao and Z. Li, *Biomaterials*, 2016, **91**, 81-89.
2. W. Ren, Y. Yan, L. Zeng, Z. Shi, A. Gong, P. Schaaf, D. Wang, J. Zhao, B. Zou, H. Yu, G. Chen, E. M. B. Brown and A. Wu, *Adv. Healthcare Mater.*, 2015, **4**, 1526-1536.
